# meaRtools: an R Package for the Analysis of Neuronal Networks Recorded on Microelectrode Arrays

Sahar Gelfman<sup>1,2</sup>, Quanli Wang<sup>1,2</sup>, Yi-Fan Lu<sup>1,2,3</sup>, Diana Hall<sup>1,2</sup>, Christopher D. Bostick<sup>1,2</sup>, Ryan Dhindsa<sup>1,2</sup>, Matt Halvorsen<sup>1,4</sup>, K. Melodi McSweeney<sup>1,2,5</sup>, Ellesse Cotterill<sup>6</sup>, Tom Edinburgh<sup>6</sup>, Michael A. Beaumont<sup>1,7</sup>, Wayne N. Frankel<sup>1,2</sup>, Slavé Petrovski<sup>1,8</sup>, Andrew S. Allen<sup>1,9</sup>, Michael J. Boland<sup>1,10</sup>, David B. Goldstein<sup>1,2</sup> and Stephen J. Eglén<sup>6</sup>

<sup>1</sup>Institute for Genomic Medicine, Columbia University Medical Center, New York, NY, 10032, USA

<sup>2</sup>Department of Genetics and Development, Columbia University Medical Center, New York, NY, 10032, USA

<sup>3</sup>Department of Biology, Westmont College, Santa Barbara, CA, 93108, USA

<sup>4</sup>Department of Genetics, University of North Carolina at Chapel Hill, Chapel Hill, North Carolina 27599, USA

<sup>5</sup>University Program in Genetics and Genomics, Duke University, Durham, North Carolina 27708, USA

<sup>6</sup>Cambridge Computational Biology Institute, University of Cambridge, Cambridge, CB3 0WA United Kingdom

<sup>7</sup>Axion BioSystems, Inc., Atlanta, GA, 30309, USA

<sup>8</sup>Department of Medicine, Austin Health and Royal Melbourne Hospital, University of Melbourne, Melbourne, Australia

<sup>9</sup> Department of Biostatistics and Bioinformatics, Duke University, Durham, NC 27708, US

<sup>10</sup> Department of Neurology, Columbia University, New York, NY, 10032, USA

## Abstract

Here we present an open-source R package ‘meaRtools’ that provides a platform for analyzing neuronal networks recorded on Microelectrode Arrays (MEAs). Cultured neuronal networks monitored with MEAs are now being widely used to characterize *in vitro* models of neurological disorders and to evaluate pharmaceutical compounds. meaRtools provides core algorithms for MEA spike train analysis, feature extraction, statistical analysis and plotting of multiple MEA recordings with multiple genotypes and treatments. meaRtools functionality covers novel solutions for spike train analysis, including algorithms to assess electrode cross-correlation using the spike train tiling coefficient (STTC), mutual information, synchronized bursts and entropy within cultured wells. Also integrated is a solution to account for bursts variability originating from mixed-cell neuronal cultures. The package provides a statistical platform built specifically for MEA data that can combine multiple MEA recordings and compare extracted features between different genetic models or treatments. We demonstrate the utilization of meaRtools to successfully identify epilepsy-like phenotypes in neuronal networks from *Celf4* knockout mice. The package is freely available under the GPL license (GPL<sub>>=3</sub>) and is updated frequently on the CRAN

1 web-server repository. The package, along with full documentation can be downloaded from:  
2 <https://cran.r-project.org/web/packages/meaRtools/>.

## 3 4 Author summary

5  
6 Cultured neuronal networks are widely used to study and characterize neuronal network activity. Among  
7 the many uses of neuronal cultures are the capabilities to evaluate neurotoxicity and the effects of  
8 pharmacological compounds on cellular physiology. Multi-well microelectrode arrays (MEAs) can collect  
9 high-throughput data from multiple neuronal cultures simultaneously, and thereby make possible  
10 hypotheses-driven inquiries into neurobiology and neuropharmacology. The analysis of MEA-derived  
11 information presents many computational challenges. High frequency data recorded simultaneously from  
12 hundreds of electrodes can be difficult to handle. The need to compare network activity across various  
13 drug treatments or genotypes recorded on the same plate from experiments lasting several weeks presents  
14 another challenge. These challenges inspired us to develop meaRtools; an MEA data analysis package  
15 that contains new methods to characterize network activity patterns, which are illustrated here using  
16 examples from a genetic mouse model of epilepsy. Among the highlights of meaRtools are novel  
17 algorithms designed to characterize neuronal activity dynamics and network properties such as bursting  
18 and synchronization, options to combine multiple recordings and use a robust statistical framework to  
19 draw appropriate statistical inferences, and finally data visualizations and plots. In summary, meaRtools  
20 provides a platform for the analyses of singular and longitudinal MEA experiments.

## 21 22 Introduction

23  
24 The MEA platform is now increasingly being used to study the response of neuronal networks to  
25 pharmacological manipulations and the spontaneous activity profiles of neural networks originating from  
26 genetic mouse models and derived from human pluripotent stem cells [1-4]. Recent studies aim to not only  
27 evaluate wild-type and mutation associated phenotypes, but also to recapitulate the *in vivo* response to  
28 various molecules, compounds and drug therapies [5, 6]. Capturing the many and varied activity features  
29 from a cultured neuronal network is critical for the full and accurate characterization of that network.  
30 However, MEA data are complex to handle. Moreover, an MEA experiment can last several weeks and  
31 incorporate many recordings and various treatments. For these reasons, there is a genuine need for  
32 methods that can adequately characterize those neuronal networks and also provide valid assessments of  
33 phenotypic differences between genotypes and [drug] treatments in an experiment lasting many days *in*  
34 *vitro* (DIV).

35  
36 The meaRtools package provides tools to identify complex phenotypes for assessing the effect of  
37 mutations and the screening of compounds in a multi-well MEA platform, as presented here in figures 4-6  
38 and as we previously shown [6]. The algorithms described here add to existing methods through  
39 calculation of cross-correlation and mutual information between electrodes, as well as enhanced  
40 identification of synchronized bursts (including entropy phenotypes for each well). The latter algorithm is  
41 shown here to identify recapitulation of *in vivo* epilepsy phenotypes in cultured neurons of the *Celf4*  
42 knockout mouse model. Incorporated into the package is also an algorithm that uses electrode-level burst  
43 features distributions to identify burst activity variations originating from neuronal subtypes in primary  
44 neuronal cultures. An earlier version of the package was recently used to examine the effects of  
45 microRNA-128 deficiency on the activity of cortical neural networks [6]. Last, the package provides

1 functions to combine many recordings from multi-DIV experiments and perform rigorous statistical tests  
2 of phenotypic differences between genotypes and/or drug treatments.

### 3 **Table 1. Abbreviations used in text**

| Abbreviation                | Meaning                                            |
|-----------------------------|----------------------------------------------------|
| aE                          | Active electrodes                                  |
| <i>Celf4</i> <sup>-/-</sup> | <i>Celf4</i> knockout mouse line                   |
| DIV                         | Days <i>in vitro</i>                               |
| EMD                         | Earth mover's distance                             |
| IBI                         | Inter-burst interval                               |
| ISI                         | Inter-spike interval                               |
| MW                          | Mann–Whitney test                                  |
| MD                          | Maximum distance                                   |
| MEA                         | Microelectrode array                               |
| MFR                         | Mean firing rate                                   |
| NS                          | Network spike                                      |
| NB                          | Network burst (synchronized burst)                 |
| Spike train                 | A sequence of action potentials recorded over time |
| STTC                        | Spike train tiling coefficient algorithm           |

## 4 5 **Design and Implementation**

6  
7 meaRtools's objective is to provide a comprehensive characterization of electrode-level and network  
8 activity on a MEA plate, that is composed of one or more wells, each well consisting of multiple  
9 electrodes.

10 The package enables a rigorous examination of differences between various genotypes and/or treatments  
11 cultured on the same plate over time. To achieve this purpose, the package provides functions to perform  
12 four major analyses (figure 1 and supplementary table S1):

- 13  
14 1) Identify simple and complex single-electrode and network (multiple electrodes) activity  
15 phenotypes. Activity attributes that are extracted include spike and burst features on an electrode-  
16 level, as well as features of synchronized network events on the multi-electrode or well-level, such  
17 as network spikes, synchronized network bursts, cross-correlation and entropy calculations.
- 18 2) Combine information from multiple recordings of the same experiment. An MEA experiment can  
19 have multiple recordings along several weeks while the neuronal culture is viable. Using  
20 meaRtools functions, many recordings of the same plate can be incorporated into a complete  
21 dataset, which can be used to test temporal replicability of results with the added advantage of  
22 enhanced statistical power.
- 23 3) Perform reproducible case/control based statistical analysis. Statistical tests are required when  
24 using the MEA platform to characterize and identify differences between genetic models and  
25 various treatments. This need intensifies when incorporating data from many recordings and

1 comparing wells grouped by identifiers (e.g. drug or other treatment). The statistical testing  
2 scheme presented here is designed to handle this problem specifically.

- 3 4) Visualize the results in presentable ready-to-use graphs and charts. The complex picture arising  
4 from MEA recordings can be examined on various resolutions: electrode-level activity, well-level  
5 synchronization and genotype or treatment activity grouped across several wells and throughout  
6 several recordings. These different resolutions can all be visualized using designated functions.  
7 Furthermore, comparisons between genotypes and treatments are visualized along with statistical  
8 test results.

9  
10 Since `meaRtools` is implemented in R, we assume familiarity with the R programming environment and  
11 provide a step-by-step workflow for an exemplary experiment consisting of three MEA recordings  
12 through the package vignette ([https://cran.r-](https://cran.r-project.org/web/packages/meaRtools/vignettes/meaRtoolsGeneralUsage.html)  
13 [project.org/web/packages/meaRtools/vignettes/meaRtoolsGeneralUsage.html](https://cran.r-project.org/web/packages/meaRtools/vignettes/meaRtoolsGeneralUsage.html)). The vignette provides a  
14 thorough guide to `meaRtools`, beginning with package installation, input handling and the various  
15 commands to identify activity features, calculate statistics, and plot. Running the vignette while reading  
16 the methods section of this manuscript will provide hands on experience and familiarity with the package.  
17 For those new to R, we recommended the introductory material found at: [https://www.rstudio.com/online-](https://www.rstudio.com/online-learning)  
18 [learning](https://www.rstudio.com/online-learning).

19  
20 Figure 1

## 21 Input and Data Organization

22  
23 The package can analyze multiple recordings with the same plate layout. The input format is similar to  
24 Axion Biosystems ‘`spike_list.csv`’ format: a comma separated file with a row for each spike holding spike  
25 time, electrode name and spike amplitude (mV, supplementary table S2). The input files can be read using  
26 the `read_spikelist` function, which then constructs an R object of class ‘`spike.list`’ that holds the following  
27 information retrieved from the input files: electrode names and positions, spike trains and recording  
28 information (start/end time, machine version). The feature extraction functions introduced below add  
29 layers to this primary ‘`spike.list`’ object (supplementary table S1).

30 The package requires a layout scheme for each experiment that lists all wells used in the experiment and,  
31 when applicable, the treatment of each well (supplementary table S3). This layout scheme is necessary to  
32 group wells for statistical comparisons of extracted features. A treatment label can represent multiple  
33 aspects used to distinguish a specific well, such as a genotype model, a drug treatment exposure, a change  
34 in the culture medium, an external stimulus, etc. The term ‘treatment’ will be used henceforth to relate to  
35 any of the above.

36  
37 Although we focus here on analyzing Axion Biosystems datasets, the package can read in data recorded  
38 from other platforms, assuming that the data can be manipulated into a straightforward text format. In this  
39 case, two files are provided, one containing the spike times recorded on each electrode and one describing  
40 the spatial position of each electrode. Our package provides a vignette that demonstrates how such data  
41 can be read in and processed; see [https://cran.r-](https://cran.r-project.org/web/packages/meaRtools/vignettes/data_input.html)  
42 [project.org/web/packages/meaRtools/vignettes/data\\_input.html](https://cran.r-project.org/web/packages/meaRtools/vignettes/data_input.html) .

43  
44  
45 Identifying Simple and Complex Single and Multi-Electrode Activity Phenotypes

1  
2 The package provides functions for identifying numerous features that characterize various network  
3 activity attributes. Features are calculated at three levels: electrode-, well- and treatment-level. Well-level  
4 calculations combine the information from all the electrodes within the well. Treatment-level calculations  
5 further group wells together by their assigned treatment label.

6  
7 For the extraction of features for spikes, bursts and network spikes described below, the package utilizes  
8 code from the open-source Sjemea R package [7] and the algorithms of Eytan and Marom [8] and  
9 Legendy and Salcman [9].

### 10 11 *Spikes, bursts and network spikes*

12  
13 Spikes, or single action potentials, are not directly detected by meaRtools. The package accepts a list of  
14 spike time stamps that were already detected by a spike detection algorithm and does not provide  
15 additional spike-detection/noise-reduction methods.

16 To calculate spike activity features and statistics, the package provides the function  
17 *calculate\_spike\_features*, which extracts spike information separately from the spike times of each  
18 electrode. Among the extracted features are various spike statistics per electrode and well, such as: 1) The  
19 number of active electrodes (aEs) per well, 2) The number of spikes, 3) Mean Firing Rate (MFR, in Hz)  
20 and 4) Inter-Spike Interval (ISI), which is the time between two sequential spikes.

21 Overall, the package provides eleven spiking statistics and features, among which are the well-level Spike  
22 Train Tiling Coefficient (STTC), mutual information and entropy measurements discussed below  
23 (supplementary table S4).

24  
25 Bursts are short periods of time with elevated spike frequencies[9]. The package provides an  
26 implementation of two algorithms for detecting rapid spiking periods using the function  
27 *calculate\_burst\_features*: the Maximum Interval[10] algorithm and the Poisson Surprise[9] algorithm that  
28 have been extensively used previously to identify spike bursts[11-14]. The use of both heuristic and  
29 statistical modeling approaches for data comparison allows for an enhanced identification of features [15].

30  
31 Using either the Maximum Interval or the Poisson Surprise algorithms produces the same burst features,  
32 among which are statistics per electrode and per-well for: 1) The number of bursts, 2) Burst durations, 3)  
33 Burst rates, 4) Spike rates within bursts, 5) IBIs and 6) ISIs within bursts.

34 Overall, the package provides 19 burst features (supplementary table S4).

35  
36 Network spikes (NSs) are synchronized events of neuronal populations in a short period of time. The  
37 meaRtools package detects these events using a well-established algorithm developed by Eytan and  
38 Marom [8] that was obtained from the sjemea package [7] and previously used for characterizing  
39 synchronized activity [16, 17]. The function *calculate\_network\_spikes* detects NS within each well. A NS  
40 is detected when there are at least a user-defined number of aEs (default 4 aEs, or 25% of total number of  
41 electrodes) detected within a user-defined time window (default 10 ms).

42 NS features are next extracted using the function *summarize.network.spikes*, and include basic statistics  
43 for: 1) NS number, 2) ISIs in NS, 3) number and 4) percentage of spikes participating in NS.

44 Overall, the package provides a total of ten NS features (supplementary table S4).

45  
46 Algorithms to assess network synchronization and burst activity patterns

1  
2  
3  
4  
5  
6  
7  
8  
9  
10  
11  
12  
13  
14  
15  
16  
17  
18  
19  
20  
21  
22  
23  
24  
25  
26  
27  
28  
29  
30  
31  
32  
33  
34  
35  
36  
37  
38  
39  
40  
41

### *Spike Train Tiling Coefficient*

We have implemented STTC to evaluate pairwise correlations between a pair of electrodes[18]. STTC has recently shown to examine the effects of an agonist of acetylcholine receptor and several inhibitory antagonists on network synchronization [19, 20]. We implemented STTC as follows: Given N active electrodes within a well, we ignore any possible dependence of distance upon correlation and simply calculate the average STTC from all  $N(N-1)/2$  pairwise correlations. Average well-level STTC values per well can be computed using the *compute\_mean\_sttc\_by\_well* function.

### *Entropy and mutual information*

Entropy and mutual information have been used previously to describe and characterize neural spike trains[21-23]. We adapted the two information theory metrics based on the original ideas presented by Shannon [24] to MEA data analysis. These metrics have utility for characterizing recordings of a single well, a set of wells per treatment, and comparing treatments from the same plate.

Entropy was used as a broad measurement of the amount of disorder measured at an MEA electrode, as well as across a well. For entropy calculations, we used the standard equation for calculating the entropy of a system:

$$H(X) = - \sum_{i=1}^n p(x_i) \log(p(x_i))$$

We define  $H(X)$  as the calculated entropy measurement for electrode X.  $i$  represents a time interval bin, out of  $n$  total separate equally sized time interval bins (default is 0.1s bin size) from start to end of the recording time. In the probability distribution,  $X_i$  is set as the number of spikes in the  $i$ 'th bin of electrode X divided by the total number of spikes observed in the full recording. For a well we use a mean statistic across all electrodes within well. When testing a full plate, we use the mean entropy across a group of wells (combined by treatment) as a test statistic representing the 'orderliness' of the firing patterns. Sets of mean entropies per treatment can be later compared to determine if there is evidence of a shift in the distribution between two different treatments. Normalized entropy statistics can be collected per well with the *calculate\_entropy\_and\_mi* function.

The second metric, mutual information, can be used to compare patterns from two separate electrodes, and could be extended to represent the network level activity of neuronal firing in a particular well. This method was used to identify differences in synchronized activity between neuronal networks from the *Celf4<sup>-/-</sup>* mouse model of epilepsy and wild-type (*Celf4<sup>+/+</sup>*) control neuronal networks (see Results). We start with the generalized equation for mutual information (MI):

$$I(X, Y) = \sum_{y \in Y} \sum_{x \in X} p(x, y) \log \frac{p(x, y)}{p(x)p(y)}$$

1 We define  $I(X,Y)$  as the information shared between electrodes X and Y. We define a number of equally  
2 distributed time interval bins in the time period and for each electrode, count the spikes in each  $b_i$ . As  
3 before, we transform X and Y into separate probability mass functions, where the probability of a spike  
4 falling in a particular time interval bin equals the count at that bin divided by the total number of spikes  
5 that detected in the recording.

6  
7 Given that the number of spikes observed during recording time can vary between electrodes, it was  
8 important to further transform X and Y to take this into account. For this we take the spike count in a time  
9 interval to infer the presence or absence of a burst, and as such we can classify each time interval at an  
10 electrode as either a burst member or non-member. To do this we transformed each input vector X such  
11 that the value  $X_i$  equals 1 if the spike count is greater than the 75th percentile of spike counts across all  
12 bins in X, and set as 0 otherwise. Such a simple transformation of the transformation of the data means  
13 that the probability mass function for X is collapsed down to  $p(X=0)$  and  $p(X=1)$ . Subsequent MI  
14 calculations are far more efficient since in terms of combinatorics, only 4 outcomes at a given time  
15 interval are possible:  $X=0/Y=0$ ,  $X=1/Y=0$ ,  $X=0/Y=1$  and  $X=1/Y=1$ . As such we explicitly compute the  
16 mutual information between electrodes X and Y as:

$$I(X,Y) = \sum_{x,y \in \{0,1\}} p(x,y) \log_2 \frac{p(x,y)}{p(x)p(y)}$$

18  
19  
20 We produce a distribution of these pairwise statistics per well, and aggregate the statistics per treatment.  
21 A Mann–Whitney (MW) test can be later performed on these sets of values between two treatments to  
22 determine if there is evidence for neurons in one treatment having a higher level of coordinated network  
23 level firing than in another treatment. Average well-level pairwise mutual information values per well can  
24 be computed using the *calculate\_entropy\_and\_mi* function.

### 26 *Burst features distributions*

27  
28 Burst features distributions are a way to compare and visualize certain burst features by looking at their  
29 density distributions along a recording. This method was previously used to successfully test the effects of  
30 a miR-128 knockdown in cultured neuronal networks[6], and was used in this study to discern between  
31 various culture treatments and cell density (see Results). The reason behind constructing this method is  
32 that primary cultures contain multiple neuronal subtypes (e.g. GABAergic and glutamatergic), which  
33 demonstrate different activity signatures [25, 26]. Thus, merely extracting a mean and standard deviation  
34 of a feature will misrepresent the activity fluctuations that arise from the combined activity of neuronal  
35 subtypes in the network. For example, spike frequencies within bursts may differ between GABAergic  
36 interneurons and glutamatergic neurons [27], with GABAergic neurons often exhibiting narrower spike  
37 wave-forms and faster-spike activity [28, 29]. Furthermore, certain anti-epileptic or anti-psychotic drugs  
38 selectively target specific neuronal subtypes. However, this selective effect may not be observed when  
39 comparing the average change of an entire cultured network.

40 The function *calc\_burst\_distributions* calculates empirical distributions for bursting features and  
41 compares them between treatments using two independent methods (figure 2A, see Statistical Testing and  
42 Visualization).

43  
44 Figure 2

1 Density distributions are calculated for five burst features: IBIs, ISIs within bursts, number of spikes in  
2 bursts, burst durations and spike frequencies within bursts (firing rate, Hz). For each feature, the  
3 algorithm adjusts for variability between electrodes in a well. This is done by calculating the histogram of  
4 a feature in each electrode separately (figure 2A, left panel) and normalizing it to values between 0-1  
5 (figure 2A, middle panel). Next, all normalized histograms are grouped and averaged by treatment labels.  
6 The algorithm permits performing this step also by grouping electrodes first by wells and then averaging  
7 well information by treatment. To later test for differences between treatments, the package provides a  
8 function which performs distribution comparison tests, permutes electrode labels and plots the results  
9 (figure 2A, right panel, see Statistical Testing and Visualization).

### 10 11 *Synchronized network bursts*

12  
13 We consider network bursts (NB) as bursts appearing at several electrodes simultaneously, that are longer  
14 and more intense synchronization events than NS and correspond to electrode-level burst activity that is  
15 synchronized across electrodes in a well. The underlying reason to identify NBs is that, while the NS  
16 detection algorithm identifies short network synchronized activity lasting tens of milliseconds,  
17 synchronized bursting events were shown to last tenths of seconds to seconds in MEA experiments [15,  
18 30, 31]. To catch these long synchronized network events, a method was constructed that investigates  
19 bursting patterns within wells and also between wells clustered based on treatments.

20 The function *calculate\_network\_bursts* combines burst information at the electrode-level into well-level  
21 data as the presentation of synchronized bursts across a well (figure 2B). First, spike time within spike  
22 trains from all electrodes is binned using a bin size of 2ms to guarantee that at most one spike is called  
23 within each bin. Next, a Gaussian filter with user-defined window sizes (defaults are: 10, 20 and 50 ms) is  
24 applied to smooth the binned spike trains from each electrode. The smoothed signal is then further  
25 standardized to have a maximum signal value of 1. All smoothed signals at the electrode-level are then  
26 combined and smoothed again using the same Gaussian filter. The final result from this step is a  
27 smoothed signal at each given window size that measures the overall synchronization of all electrodes in a  
28 well, with larger values indicating higher level of synchronized bursting activities. Then, the Otsu global  
29 thresholding method is applied to the well-level signal to automatically detect burst intervals [32]. This  
30 method was chosen for its simplicity and parameter free nature, although other methods, such as adaptive  
31 thresholding, can be utilized. Last, based on the network burst intervals obtained from Otsu thresholding,  
32 network burst information is collected at the well-level.

33 The algorithm extracts statistics for: the number and rate of NBs, the number and percentage of spikes  
34 participating in NBs and the spike intensities within NBs, which is the spike rate within NBs. These NB  
35 statistics were previously shown to infer the biological effects of miR-128 knockdown in cultured  
36 neuronal networks [6] and are shown in this work to successfully identify significantly higher  
37 synchronization of bursts in a mouse epilepsy model (figure 4B-4C) and in the homozygous *Celf4<sup>-/-</sup>*  
38 mouse model (figure 6B-6C).

39 Overall, the package provides 11 NB features for each time window to a total of 33 features  
40 (supplementary table S4).

### 41 42 *Combining Multiple Recordings*

43  
44 MEA experiments are constructed from multiple recordings of the same plate over a certain period of  
45 time. Correctly assessing the activity and differences over time requires analyzing several recordings as  
46 one set of information with various time points. The package provides functions for combining several



1 recordings and filtering wells from the combined dataset based on inactivity measurements. All feature  
2 extraction functions store the extracted information in the same ‘spike.list’ object. The function  
3 *aggregate\_features* uses the information stored in the ‘spike.list’ object to combine data from all the  
4 analyzed recordings into an aggregated table for each feature. The aggregated tables have recording labels  
5 as columns and well-labels as rows, and can be printed as csv files or used later for treatment  
6 comparisons. The package also provides the function *filter\_wells* to exclude inactive wells from these  
7 aggregated tables. An active well is measured using a minimum number of aEs (default 4, or  $\frac{1}{4}$  of the  
8 total number of electrodes). The function *filter\_wells* considers whether a well has been active in more  
9 than a certain percentage of recordings in the experiment (default is 50%). Inactive wells that fail to meet  
10 this criterion are not used when comparing treatments.

## 11 12 Statistical Testing and Visualization

13  
14 The combined tables from multiple recordings can next be used to compare treatments along the  
15 experiment. The function *permute\_features\_and\_plot* performs all the necessary statistical tests between  
16 treatment labels and plots the results of all features in .pdf format in a designated output directory. The  
17 tests are performed as follows: First, a MW test is performed to compare distributions of each feature  
18 between treatments, and the resultant p-value is recorded. Next, a permutation scheme is performed where  
19 the treatment labels of the active wells are randomly shuffled X times (default 100) while the observations  
20 within each well are kept intact. This preserves correlations between time points within wells while  
21 breaking any relationship with treatment and subsequent outcome. A permutation p-value for the original  
22 MW test is computed as the proportion of permuted data MW p-values that were less than or equal to the  
23 MW p-value of the original un-permuted dataset. Last, for each feature, a graph and a table (csv format)  
24 are printed with the mean and standard error (SEM) of the measured features for each of the recordings.

25  
26 Comparing and plotting burst distributions, is done using the function *dist\_perm*. The algorithm works as  
27 follows: For each of the five burst features, the function *calc\_burst\_distributions* generates a normalized  
28 histogram per electrode (supplementary table S5). Next, the function *dist\_perm* groups all distributions by  
29 treatment labels and compares them between treatments using two methods: 1) The Earth Mover’s  
30 Distance (EMD), using R package *emd* (<http://www.rforge.net/emd>) and 2) the Maximum Distance  
31 (MD) between the cumulative distributions of the normalized histograms.

32 Once the test results for EMD and MD are computed for the original dataset, a permutation scheme is  
33 performed where the treatment labels of the active wells are randomly shuffled X times (default 100)  
34 while the distributions within each well are kept intact. A permutation p-value for EMD is then computed  
35 as the proportion of permuted data EMD values that are equal to or greater than the original EMD value  
36 from the un-permuted dataset. A permutation p-value for MD is defined similarly. Last, both the  
37 normalized and cumulative histograms are plotted with the final permuted p-value.

## 38 39 Results

40  
41 The *meaRtools* package can be used as an analysis pipeline on an experiment composed of data from  
42 several recordings and with several treatments. The package is shown here to extract novel biological  
43 insights by identifying neuronal phenotypes of a *Celf4* epilepsy mouse model[33] and was also recently  
44 utilized to assessing the effects of miRNA deficiency on neuronal activity [6], both of which demonstrate  
45 the ability of the algorithms presented here to identify and provide robust statistical measurements for

1 simple and complex network-associated phenotypes. Below, we present various experimental examples to  
2 illustrate the diverse features and uses of mearTools.

### 3 4 General Activity Information

5  
6 To gain a preliminary view of plate activity, the package generates graphs of activity measurements for  
7 three levels of data: electrode-, well- and plate-levels. Presented here are a subset of these graphs for a  
8 single recording in a 48-well plate (16 electrodes per well) containing cultured cortical neural networks  
9 from the brains of postnatal wild-type mice. The lowest resolution map of the plate shows a matrix of all  
10 aEs for each well in the plate (figure 3A). A higher resolution graph shows electrode activity per well as  
11 the MFR of all aEs (figure 3B). Even higher resolution shows the MFR of each electrode in each well  
12 (figure 3C represents a 900s recording). The latter is plotted for each well separately.

#### 13 14 Figure 3

15 In order to demonstrate network behavior before and after each NS, we show the number of electrodes  
16 participating in NS around the peak of a network event (figure 3D). For example: some networks present  
17 a decline in participating electrodes before the event takes place (wells B1, C1 and D1 in figure 3D),  
18 while others exhibit a gradually increasing number of electrodes participating in a NS before a fast  
19 accumulation of electrodes leading to the NS peak (wells F1 and F8, figure 3D).

20 The full set of graphs that can be printed by the package is available as supplementary information and  
21 includes log ISI statistics, spike statistics within bursts and other network information. These graphs  
22 provide an overall view of the activity of a single recording.

### 23 24 Longitudinal Modulation of Network Activity by Drug Treatment

25  
26 For every extracted feature a comparison can be made between treatments in a multiple-recording  
27 experiment. For every activity attribute (i.e. spikes, bursts, NSs and NBs), an output folder is created with  
28 .csv files for every feature, holding average values per well for every recording analyzed. An example is  
29 shown here for Spike Intensity within NBs representing DIV 11-14 analysis of two genotypes of a genetic  
30 mouse model of epilepsy; which are heterozygous (+/-) or homozygous (-/-) for a specific mutation  
31 (figure 4A). Also printed are graphs showing mean and standard error for each feature. These graphs  
32 compare the treatments over all the analyzed recordings (figure 4B-4E). The output directories include  
33 tables and graphs for a total of 70 features: eight spike features, 19 burst features, 10 NS features and 33  
34 NB (see supplementary table S4).

#### 35 36 Figure 4

37 The comparison analysis is flexible and can be performed for subsets of recordings and treatments. The  
38 example in figure 4B and 4C shows a comparison of network activity between the two genotypes (+/- and  
39 -/-). Under each graph are the results of multiple MW and permutation tests performed between the  
40 genotypes. The Spike Intensity within Network Bursts feature (spikes per NB per sec) analyzed here  
41 illustrates the synchronization level of a network. A comparison of treatments, using five recordings from  
42 an experiment comprised of 14 DIV, shows a trend for higher spike intensities in the homozygous  
43 genotype, which is not significant after a permutation test (figure 4B). However, inclusion of data from  
44 three more DIV shows a significantly increased network synchronization in the homozygous genotype  
45 (figure 4C).

1 The feature comparison analysis is not limited to the number of recordings or treatments. In figure 4D, the  
2 number of aEs are shown for an experiment spanning 27 DIV. This experiment had three treatments: a  
3 vehicle treated control and two concentrations (0.1nM and 1nM) of a sodium channel blocker (figure 4D-  
4 4E). The treatment was administered on DIV 20 and the plate was recorded for 7 DIV following drug  
5 administration. Analysis of the number of aEs shows no significant difference between groups before the  
6 drug was added, and a dramatic decrease in number of aEs in the wells treated with 1nM but not those  
7 treated with 0.1nM (figure 4D, green vs red lines, respectively). As expected, MFR analysis indicates a  
8 significant decrease in MFR for both 0.1nM and 1nM drug treatments[34]. Moreover, the kinetics of  
9 MFR decrease are relative to the drug concentration, as is the time it takes the MFR to return to untreated  
10 values (figure 4E, red and green lines).

11  
12 Overall, these results present the flexibility of the functions to handle varying number of recordings and  
13 provide true biological insights. The ability to test treatment differences over many recordings, presented  
14 here for the first time, provides a strong and valuable tool to assure drug, compound or genotype effect.

## 15 16 Burst Features Distributions Discern Various Culture Treatments

17  
18 In addition to the comprehensive examination of synchronization between electrodes, meaRtools provides  
19 a way to identify changes in bursting activity characteristics throughout the recording through examining  
20 distributions of burst features such as duration and spike frequency within bursts. Burst features  
21 distributions can account for the differing behaviors of neuronal subtypes in a primary culture. For  
22 example, burst activity might have differing durations, fluctuating spike rates and other features that are  
23 influenced by different activity profiles of specific cell types. While these varying activity properties  
24 might not be caught using simple statistical measurements, they can be identified using empirical  
25 distributions of features.

26  
27 Burst features distributions can be compared between treatments in single or multiple recordings. Single  
28 recording treatment comparisons are tested using the Kolmogorov-Smirnov test (K-S test) for comparing  
29 probability distributions. For instance, when comparing the effects of cell density on network behavior, a  
30 significantly higher proportion of low Spike Frequencies is observed at low cell density of 25,000 (25k)  
31 cells relative to higher densities (figure 5A, red line), suggesting that higher cell densities have higher  
32 spike frequencies within bursts. In a separate experiment, we compared the effects of two different  
33 microbial light sensitive membrane proteins: Channelrhodopsin-2 (Chr2) and Archaelhodopsin-T (ArchT)  
34 on burst duration. We observed a higher ratio of long burst durations for 'Chr2' that is not significant  
35 between treatments (figure 5B, red line).

## 36 37 Figure 5

38 Comparisons of Burst features' distributions can be performed over multiple recordings. The analysis of  
39 number of spikes in a burst is presented here for an experiment with 24 recordings that were combined  
40 using the methods above. The differences between treatments are calculated using two measurements of  
41 distances (figure 5C-D), and followed by permutation tests. This specific analysis successfully validates  
42 that a treatment using a specific compound treatment at 25 $\mu$ M (figure 5C-D, red line) has significantly  
43 more bursts with low number of spikes than the 100 $\mu$ M treatment (blue line).

## 44 45 Identification of excitability phenotypes in a mouse seizure model

1

2 We utilized the full capabilities of meaRtools to identify and compare complex activity phenotypes of a  
3 *Celf4* knockout (*Celf4*<sup>-/-</sup>) mouse seizure model. [33, 35]. Here, we demonstrate that the MEA platform,  
4 analyzed with meaRtools, can identify epilepsy-like phenotypes in neuronal networks from *Celf4*<sup>-/-</sup> mice.

5 Seizures are often characterized by hypersynchronous discharges that may occur at a specific region of  
6 the cortex and spread into neighbouring brain areas. The cellular mechanism of seizure initiation is  
7 thought to be the network hyper-synchronization and high frequency bursts consisting of increased  
8 density of action potentials, presumably due to an excitation/inhibition imbalance [36]. Sufficiently  
9 synchronized bursts may pass the threshold of surrounding inhibition and activate neighboring neurons  
10 leading to broader recruitment, network propagation and ultimately seizures. While the *in vitro*  
11 manifestations of seizures are not fully understood, it is thought that both increased synchronicity of  
12 network firing and increased bursting are analogous to the *in vivo* phenotype [37]. As mentioned, *Celf4*  
13 deficiency is known to cause neurological phenotypes in mice including, most prominently convulsive  
14 seizures [33, 35]. Here, we use *Celf4*<sup>-/-</sup> mice as “proof of concept” for whether meaRtools synchronization  
15 algorithms can identify aberrant excitability phenotypes that are often characteristic of mouse seizure  
16 models.

17 We examined the various features and statistics that meaRtools computes and found that *Celf4*<sup>-/-</sup> neurons  
18 consistently showed significant elevation in several features compared to wild-type (*Celf4*<sup>+/+</sup>) neurons,  
19 among which were: increased frequency of spikes in bursts (permutation p value < 0.01), increased  
20 mutual information between electrodes (permutation p value < 0.01) and an increase in various NB  
21 phenotypes (figure 6 , permutation p values < 0.01 - 0.02, supplementary table S6). Together, these  
22 features offer a view of the change in network synchronization of *Celf4*<sup>-/-</sup> mice, and point to a higher  
23 density of spikes in bursts and a higher synchronization of bursts between neurons belonging to the same  
24 neuronal network. This phenomenon was tested across an experiment lasting 23 DIV, where *Celf4*<sup>+/+</sup> and  
25 *Celf4*<sup>-/-</sup> genotypes were cultured on 12 and 11 active wells, respectively. The final statistical tests were  
26 performed on recordings from DIV 15-23, starting when the networks were developed and reached a  
27 stable MFR and ending with cell death. The results were replicated in another experiment lasting 23 DIV,  
28 where each genotype was cultured in nine wells.

29

30 We have also examined the change in MFR between the genotypes, and find a slight increase in MFR in  
31 the *Celf4*<sup>-/-</sup> neurons (supplementary Table S6). However, this increase did not survive the meaRtools  
32 permutation scheme and could not explain the significant increase in synchronization phenotypes  
33 observed in figure 6.

34

35 Figure 6

36

## 37 Performance

38

39 The performance of the package was tested by analyzing an experiment made of three recording files of  
40 40s, 60s and 60s on a 48-well plate with 16 electrodes in each well. We ran the full package vignette,  
41 extracting all possible features and statistics for each recording including: spike statistics, mutual  
42 information, STTC, burst statistics and distributions, network spikes and synchronized network bursts.  
43 The test also included combining data statistics from all recordings of the experiment and performing 100  
44 default permutations for testing differences between three available treatments for all 73 available  
45 features. The test concludes by plotting the comparison between treatments for all the features tested. On

1 a MacBook Pro with a 2.8 GHz Intel Core i7 CPU and 16 GB of 1600 MHz RAM, the average execution  
2 time for this test was 3.23 min and 4.97 min, excluding or including permutation and plotting,  
3 respectively. Increasing the number of permutations to 1000 increased the run time significantly to 16.05  
4 minutes.

## 6 Discussion

8 The package presented here was constructed with the intention of providing a platform with a wide range  
9 of MEA analysis capabilities. We made sure it incorporates commonly used algorithms for spike activity  
10 analysis with new capabilities, presented in meaRtools for the first time, such as the ability to combine  
11 MEA recordings and apply rigorous statistical tests to compare between groups of wells with varying  
12 treatments.

14 Included in meaRtools are methods for burst and activity measurements that are currently available in  
15 commercial software packages, such as NeuroExplorer[10]. Features that are common to both tools are  
16 routinely used for network analysis and include standard spike and burst metrics, such as firing rate,  
17 number of bursts detected, percentage of total spikes that are contained in bursts, inter-spike and inter-  
18 burst intervals, etc. Furthermore, the maximum interval burst detection algorithm is implemented based  
19 on the algorithm presented in NeuroExplorer. Activity features we report here that are unique to  
20 meaRtools include additional synchrony measures, such as the spike train tiling coefficient (STTC),  
21 entropy and mutual information and synchronized network bursts analysis. While NeuroExplorer offers  
22 additional visualization and waveform analysis options, meaRtools is a freely-available open-source  
23 package that leverages the powerful statistical analysis capabilities and flexibility of the R programming  
24 language to provide a consolidated comparison of multiple experiments into a single, summarized  
25 statistical and graphical output. Last, although the manuscript is aimed at *in-vitro* MEA analysis, the  
26 algorithms presented here can be equally applicable to *in-vivo* MEA work, and in general to the analysis  
27 of any action potential spike time stamp data.

29 In conclusion, the meaRtools package extracts a detailed report of over 70 activity phenotypes (features),  
30 both previously existing and novel. The package provides a single platform to handle multiple recordings  
31 of the same experiment, and the tools to perform statistical comparisons between treatments on these  
32 multiple recording experiments.

## 34 Availability and Future Directions

36 The meaRtools package is open-source and freely available under the General Public License version 3.0  
37 (GPL>=3). The package is available on the CRAN web-server repository ([https://cran.r-  
38 project.org/web/packages/meaRtools/index.html](https://cran.r-project.org/web/packages/meaRtools/index.html)). Updated source-code can be found at  
39 <https://github.com/igm-team/meaRtools>. The package provides a step by step vignette for running an  
40 MEA analysis pipeline using exemplary datasets in an effort to make MEA analysis accessible to all.

41 Here we explain the major analyses that can be done using meaRtools and focus on several features to  
42 perform detection of phenotypic differences. However, the current version of the package detects 73  
43 features and five feature distributions that can be used in the holistic evaluation of an MEA experiment.  
44 Users are encouraged to explore all the features and capabilities the package entails with the help of the

1 package vignette.

2 The package is updated regularly; each version incorporates additional capabilities to detect and test  
3 additional phenotypes. Current work focuses on adding machine learning algorithms to distinguish  
4 between treatments, graphical representation of network bursts and activity pattern recognition algorithms  
5 within and between wells.

6

7 Figure and table legend

8

9 **Figure 1.** A general scheme of an analysis workflow for several MEA recordings.

10 **Figure 2.** Schemes for computing network bursts and burst distributions. **A)** Creating burst features  
11 distributions. First, burst feature histogram is calculated for each electrode (left panel). In this example, it  
12 is calculated for burst duration. Next, histograms are normalized to number of values, resulting in a 0-1  
13 value. Last, all electrodes are averaged to create a normalized distribution plot (top right panel) and a  
14 cumulative plot (bottom right panel) for each tested treatment. **B)** Detecting synchronized bursts. Spike  
15 data from a raster plot (upper panel) showing the spikes (x-axis) for each active electrode (y-axis) is  
16 binned and combined through a weighted Gaussian kernel smoothing method to generate the fraction of  
17 active electrodes (blue lines in lower panel). The Otsu global thresholding algorithm[32] is then applied to  
18 identify intervals above the threshold (red horizontal line) as synchronized network bursts.

19

20 **Figure 3.** General information of plate activity. **A)** A matrix representing a 48-well plate, where each well  
21 consists of 16 electrodes. aEs are represented by name consisting of column+row position in each well  
22 (“11” for first electrode to “44” for the last). **B)** MFR (Hz) for aEs per well in a 48-well plate. Title for  
23 each well has the genotype label of the well: ++ (wild-type), -/- (homozygous), +/- (heterozygous), NA  
24 (Not available). **C)** Average MFR of all 16 electrodes of well A6, presented for each second of a 900s  
25 recording. **D)** Average number of electrodes participating in NSs around the peak of a network event. The  
26 x-axis represents user-defined time bins (default is 100 ms) before and after a NS peak (-10 equals 1s  
27 before the peak). Title for each well consists of well-name and number of identified NSs.

28

29 **Figure 4.** Comparing features between treatments. In panels A-C, treatment refers to genotype  
30 (heterozygous, +/- and homozygous, -/-). In panels D and E, treatment refers to drug treatment. **A)**  
31 Output tables are printed for every feature, holding average values (in this case, Spike Intensity per aEs)  
32 per well (rows) and for every recording analyzed (columns). **B)** Spike Intensity per aEs for two genotypes  
33 by DIV on a subset of five recordings. This graph corresponds to the full aggregated table of A). **C)** Same  
34 as B), but for a subset of eight recordings. **D)** Comparing the number of aEs for wells treated with a  
35 vehicle or one of two channel blocker treatments (0.1nM and 1nM) along a 27 DIV experiment. **E)** MFR  
36 for the same experiment as in D), showing differences in the effects of drug concentrations.

37

38 **Figure 5.** Burst features distributions. **A)** Frequencies (y-axis) of spike-rate in bursts (x-axis) are  
39 calculated for four different cell density cultures in a single recording. A user defined maximum of 300  
40 Hz is set. **B)** Frequencies (y-axis) of burst durations (x-axis) are presented when introducing two different  
41 microbial light sensitive membrane proteins vs. untreated cells in a single recording. A user defined  
42 maximum for burst duration was set to 3 seconds. **C)** Combining burst features distributions of number of  
43 spikes in bursts from 24 sequential same-plate recordings. Treatments were automatically tested for  
44 difference using the EMD test and results were displayed after permutations. **D)** Cumulative distributions

1 of the same data as in C), treatments were automatically tested for difference using the MD test and  
2 results were displayed after permutations.

3  
4 **Figure 6.** *Celf4*<sup>-/-</sup> neurons show elevated network synchronization phenotypes. **A)** Spike frequency in  
5 bursts for *Celf4*<sup>+/+</sup> (blue) and *Celf4*<sup>-/-</sup> (red) neural networks. **B)** Mutual information between electrodes is  
6 increased in *Celf4*<sup>-/-</sup> networks (red). **C)** The percent of spikes participating in NBs is increased in *Celf4*<sup>-/-</sup>  
7 neurons (red), suggesting that ratio of spikes that participate in synchronized network events is higher in  
8 the *Celf4*<sup>-/-</sup> networks. **D)** Raster plots show network spikes (vertical green lines) and bursts (horizontal red  
9 lines) for two adjacent wells: a *Celf4*<sup>-/-</sup> well (upper panel) and a *Celf4*<sup>+/+</sup> well (lower panel). *Celf4*<sup>-/-</sup>  
10 exhibits few sporadic spikes between highly synchronized events, while *Celf4*<sup>+/+</sup> exhibits less network  
11 events and more sporadic spikes. Raster plots present 60 seconds of 900 seconds recordings.

## 12 13 References

- 14  
15 1. Bateup HS, Johnson CA, Denefrio CL, Saulnier JL, Kornacker K, Sabatini BL.  
16 Excitatory/inhibitory synaptic imbalance leads to hippocampal hyperexcitability in mouse models of  
17 tuberous sclerosis. *Neuron*. 2013;78(3):510-22.
- 18 2. Cao Z, Hulsizer S, Tassone F, Tang HT, Hagerman RJ, Rogawski MA, et al. Clustered burst firing  
19 in FMR1 premutation hippocampal neurons: amelioration with allopregnanolone. *Hum Mol Genet*.  
20 2012;21(13):2923-35.
- 21 3. Chailangkarn T, Trujillo CA, Freitas BC, Hrvoj-Mihic B, Herai RH, Yu DX, et al. A human  
22 neurodevelopmental model for Williams syndrome. *Nature*. 2016;536(7616):338-43.
- 23 4. Wainger BJ, Kiskinis E, Mellin C, Wiskow O, Han SS, Sandoe J, et al. Intrinsic membrane  
24 hyperexcitability of amyotrophic lateral sclerosis patient-derived motor neurons. *Cell Rep*. 2014;7(1):1-11.
- 25 5. Valdivia P, Martin M, LeFew WR, Ross J, Houck KA, Shafer TJ. Multi-well microelectrode array  
26 recordings detect neuroactivity of ToxCast compounds. *Neurotoxicology*. 2014;44:204-17.
- 27 6. McSweeney KM, Gussow AB, Bradrick SS, Dugger SA, Gelfman S, Wang Q, et al. Inhibition of  
28 microRNA 128 promotes excitability of cultured cortical neuronal networks. *Genome Res*.  
29 2016;26(10):1411-6.
- 30 7. Eglén SJ, Weeks M, Jessop M, Simonotto J, Jackson T, Sernagor E. A data repository and analysis  
31 framework for spontaneous neural activity recordings in developing retina. *Gigascience*. 2014;3(1):3.
- 32 8. Eytan D, Marom S. Dynamics and effective topology underlying synchronization in networks of  
33 cortical neurons. *J Neurosci*. 2006;26(33):8465-76.
- 34 9. Legendy CR, Salcman M. Bursts and recurrences of bursts in the spike trains of spontaneously  
35 active striate cortex neurons. *J Neurophysiol*. 1985;53(4):926-39.
- 36 10. Technologies N. Neuroexplorer Manual 2014. Available from:  
37 <http://www.neuroexplorer.com/downloads/NeuroExplorerManual.pdf>.
- 38 11. Mack CM, Lin BJ, Turner JD, Johnstone AF, Burgoon LD, Shafer TJ. Burst and principal  
39 components analyses of MEA data for 16 chemicals describe at least three effects classes.  
40 *Neurotoxicology*. 2014;40:75-85.
- 41 12. Gramowski A, Jugelt K, Stuwe S, Schulze R, McGregor GP, Wartenberg-Demand A, et al.  
42 Functional screening of traditional antidepressants with primary cortical neuronal networks grown on  
43 multielectrode neurochips. *Eur J Neurosci*. 2006;24(2):455-65.
- 44 13. Jackson ME, Homayoun H, Moghaddam B. NMDA receptor hypofunction produces concomitant  
45 firing rate potentiation and burst activity reduction in the prefrontal cortex. *Proc Natl Acad Sci U S A*.  
46 2004;101(22):8467-72.

- 1 14. Urbain N, Rentero N, Gervasoni D, Renaud B, Chouvet G. The switch of subthalamic neurons  
2 from an irregular to a bursting pattern does not solely depend on their GABAergic inputs in the  
3 anesthetic-free rat. *J Neurosci*. 2002;22(19):8665-75.
- 4 15. Cotterill E, Charlesworth P, Thomas CW, Paulsen O, Eglén SJ. A comparison of computational  
5 methods for detecting bursts in neuronal spike trains and their application to human stem cell-derived  
6 neuronal networks. *J Neurophysiol*. 2016;116(2):306-21.
- 7 16. Kermany E, Gal A, Lyakhov V, Meir R, Marom S, Eytan D. Tradeoffs and constraints on neural  
8 representation in networks of cortical neurons. *J Neurosci*. 2010;30(28):9588-96.
- 9 17. Thivierge JP, Cisek P. Nonperiodic synchronization in heterogeneous networks of spiking neurons.  
10 *J Neurosci*. 2008;28(32):7968-78.
- 11 18. Cutts CS, Eglén SJ. Detecting pairwise correlations in spike trains: an objective comparison of  
12 methods and application to the study of retinal waves. *J Neurosci*. 2014;34(43):14288-303.
- 13 19. Colombi I, Tinarelli F, Pasquale V, Tucci V, Chiappalone M. A Simplified In vitro Experimental  
14 Model Encompasses the Essential Features of Sleep. *Front Neurosci*. 2016;10:315.
- 15 20. Davis ZW, Chapman B, Cheng HJ. Increasing Spontaneous Retinal Activity before Eye Opening  
16 Accelerates the Development of Geniculate Receptive Fields. *J Neurosci*. 2015;35(43):14612-23.
- 17 21. Butts DA, Rokhsar DS. The information content of spontaneous retinal waves. *J Neurosci*.  
18 2001;21(3):961-73.
- 19 22. de Ruyter van Steveninck RR, Lewen GD, Strong SP, Koberle R, Bialek W. Reproducibility and  
20 variability in neural spike trains. *Science*. 1997;275(5307):1805-8.
- 21 23. Schneidman E, Berry MJ, 2nd, Segev R, Bialek W. Weak pairwise correlations imply strongly  
22 correlated network states in a neural population. *Nature*. 2006;440(7087):1007-12.
- 23 24. Shannon CE. The mathematical theory of communication. *Bell System Technical Journal*.  
24 1949;27:379–423, 623–56.
- 25 25. Molyneaux BJ, Arlotta P, Menezes JR, Macklis JD. Neuronal subtype specification in the cerebral  
26 cortex. *Nat Rev Neurosci*. 2007;8(6):427-37.
- 27 26. Zeisel A, Muñoz-Manchado AB, Codeluppi S, Lönnerberg P, La Manno G, Jureus A, et al. Brain  
28 structure. Cell types in the mouse cortex and hippocampus revealed by single-cell RNA-seq. *Science*.  
29 2015;347(6226):1138-42.
- 30 27. Weir K, Blanquie O, Kilb W, Luhmann HJ, Sinning A. Comparison of spike parameters from  
31 optically identified GABAergic and glutamatergic neurons in sparse cortical cultures. *Front Cell Neurosci*.  
32 2014;8:460.
- 33 28. Mann EO, Paulsen O. Role of GABAergic inhibition in hippocampal network oscillations. *Trends*  
34 *Neurosci*. 2007;30(7):343-9.
- 35 29. Bean BP. The action potential in mammalian central neurons. *Nat Rev Neurosci*. 2007;8(6):451-  
36 65.
- 37 30. Belykh I, de Lange E, Hasler M. Synchronization of bursting neurons: what matters in the network  
38 topology. *Phys Rev Lett*. 2005;94(18):188101.
- 39 31. Gullo F, Manfredi I, Lecchi M, Casari G, Wanke E, Becchetti A. Multi-electrode array study of  
40 neuronal cultures expressing nicotinic beta2-V287L subunits, linked to autosomal dominant nocturnal  
41 frontal lobe epilepsy. An in vitro model of spontaneous epilepsy. *Front Neural Circuits*. 2014;8:87.
- 42 32. Otsu N. A threshold selection method from gray-level histograms. *Automatica*. 1975;11(285-  
43 296):23-7.
- 44 33. Yang Y, Mahaffey CL, Berube N, Maddatu TP, Cox GA, Frankel WN. Complex seizure disorder  
45 caused by *Brunol4* deficiency in mice. *PLoS Genet*. 2007;3(7):e124.



- 1 34. McConnell ER, McClain MA, Ross J, Lefew WR, Shafer TJ. Evaluation of multi-well  
2 microelectrode arrays for neurotoxicity screening using a chemical training set. *Neurotoxicology*.  
3 2012;33(5):1048-57.
- 4 35. Wagon JL, Mahaffey CL, Sun W, Yang Y, Chao HT, Frankel WN. Etiology of a genetically  
5 complex seizure disorder in *Celf4* mutant mice. *Genes Brain Behav*. 2011;10(7):765-77.
- 6 36. In: Bromfield EB, Cavazos JE, Sirven JI, editors. *An Introduction to Epilepsy*. West Hartford  
7 (CT)2006.
- 8 37. Lignani G, Raimondi A, Ferrea E, Rocchi A, Paonessa F, Cesca F, et al. Epileptogenic Q555X  
9 SYN1 mutant triggers imbalances in release dynamics and short-term plasticity. *Hum Mol Genet*.  
10 2013;22(11):2186-99.

11  
12 **Supporting information legend**

13  
14 **Supplementary Table S1.** Primary meaRtools functions. Functions used to calculate activity features and  
15 statistics, their expected input and provided output.

16 **Supplementary Table S2.** Input file. The input format is a comma separated file with a row for each  
17 spike holding spike time, electrode name and spike amplitude.

18 **Supplementary Table S3.** Plate layout. A file describing the plate layout scheme for each experiment  
19 that lists all wells used in the experiment and the treatment of each well.

20 **Supplementary Table S4.** Extracted Features. A table describing all activity features and statistics  
21 calculated by the package and the relevant functions used to calculate each feature.

22 **Supplementary Table S5.** Burst feature distribution file. An exemplary output of the burst duration  
23 distribution algorithm: a table holding 0-1 normalized histogram values for each electrode.

24 **Supplementary Table S6.** MEA phenotype of *Celf4* KO neurons. Differences in activity features  
25 between the *Celf4*<sup>+/+</sup> and *Celf4*<sup>-/-</sup> neural networks presented for original (left) and replicated (right)  
26 experiments.

27

28

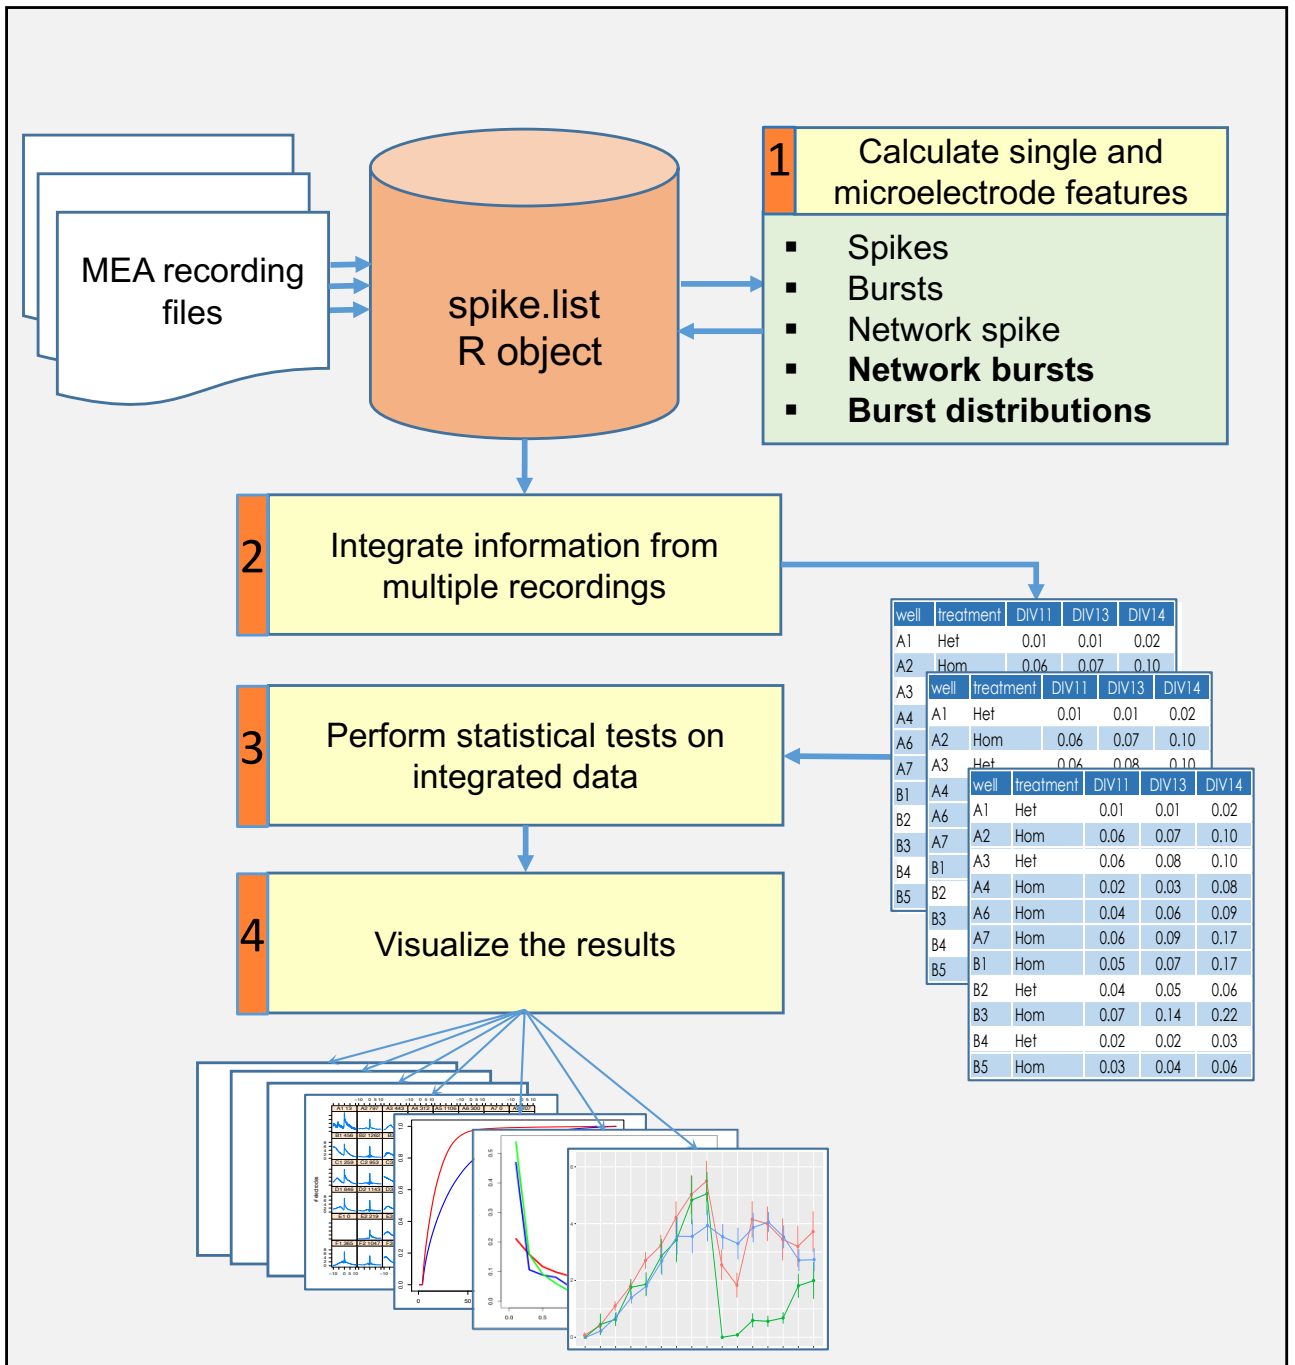

Figure 1



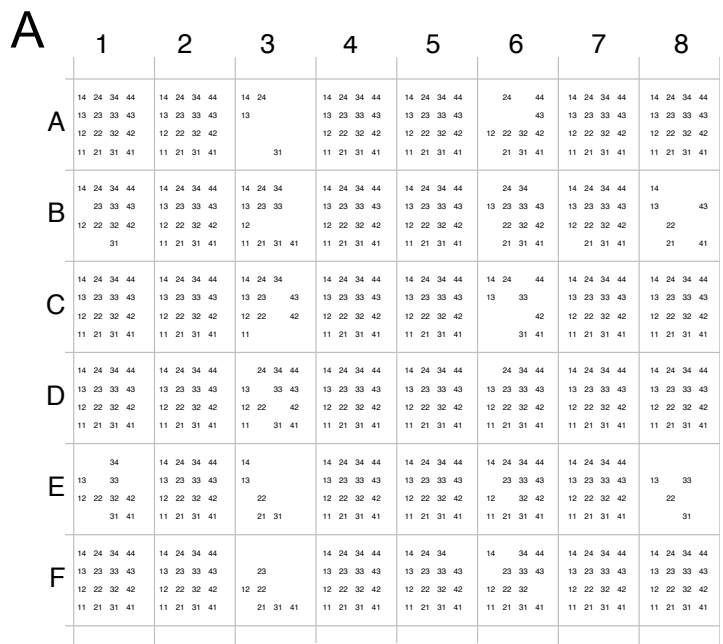

Plate layout

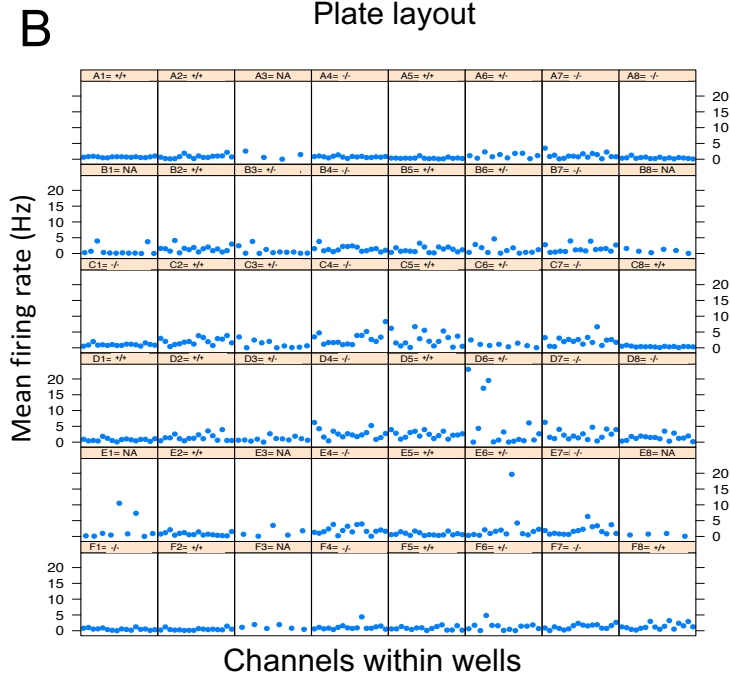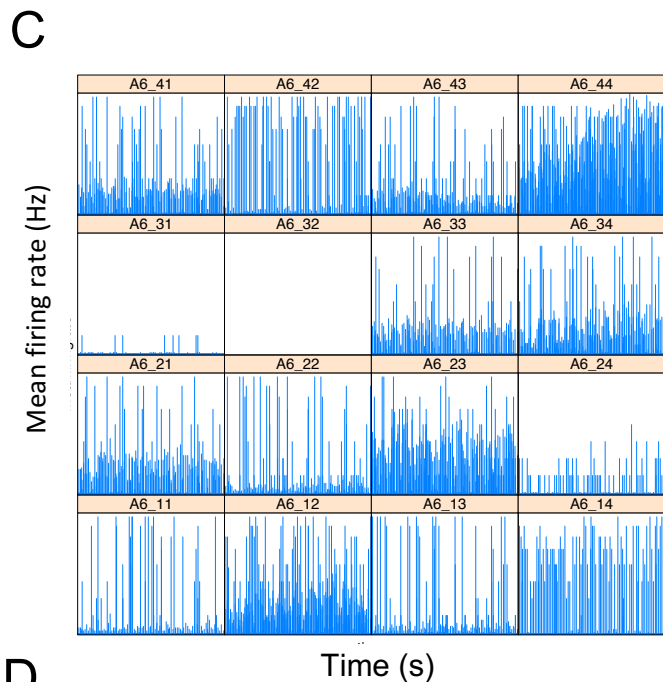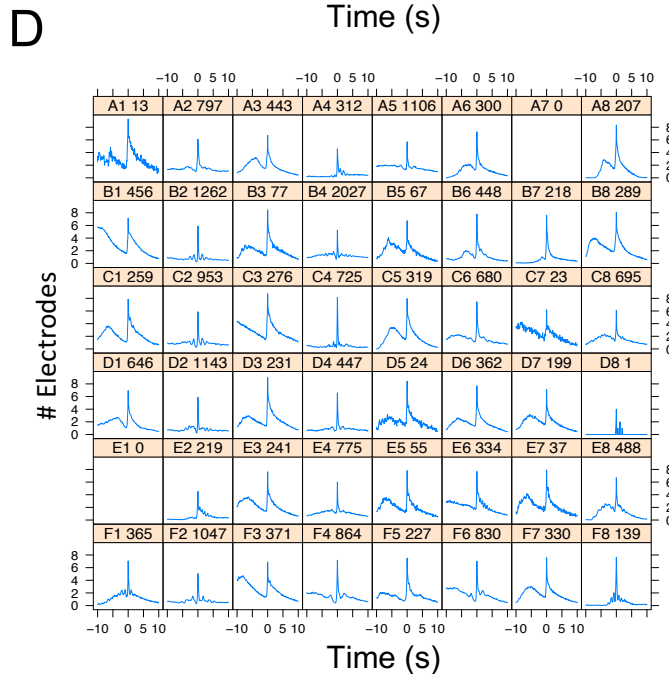

Figure 3

A

| well | treatment | DIV11 | DIV13 | DIV14 |
|------|-----------|-------|-------|-------|
| A1   | +/-       | 0.01  | 0.01  | 0.02  |
| A2   | -/-       | 0.06  | 0.07  | 0.10  |
| A3   | +/-       | 0.06  | 0.08  | 0.10  |
| A4   | -/-       | 0.02  | 0.03  | 0.08  |
| A6   | -/-       | 0.04  | 0.06  | 0.09  |
| A7   | -/-       | 0.06  | 0.09  | 0.17  |
| B1   | -/-       | 0.05  | 0.07  | 0.17  |
| B2   | +/-       | 0.04  | 0.05  | 0.06  |
| B3   | -/-       | 0.07  | 0.14  | 0.22  |
| B4   | +/-       | 0.02  | 0.02  | 0.03  |
| B5   | -/-       | 0.03  | 0.04  | 0.06  |

B

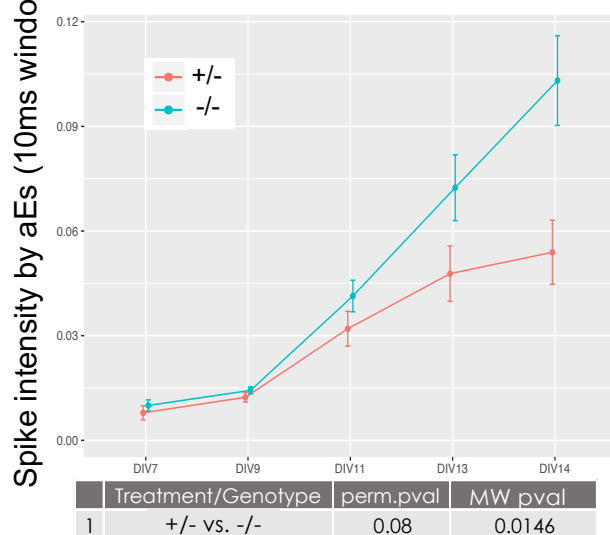

C

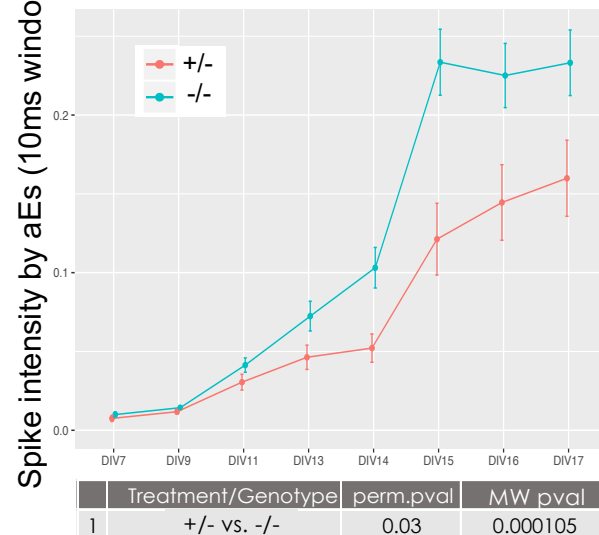

D

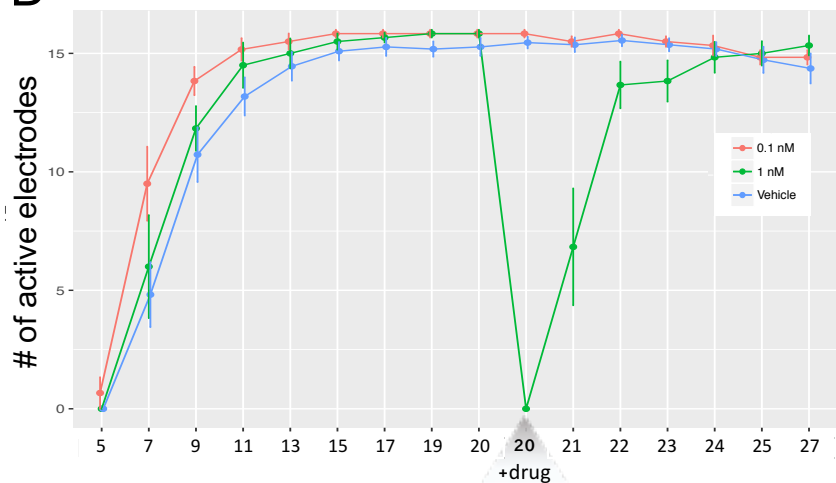

|   | Treatment/Genotype | perm.pval | MW pval |
|---|--------------------|-----------|---------|
| 1 | Vehicle vs. 0.1 nM | 0.39      | 0.0506  |
| 2 | Vehicle vs. 1 nM   | 0.41      | 0.136   |

E

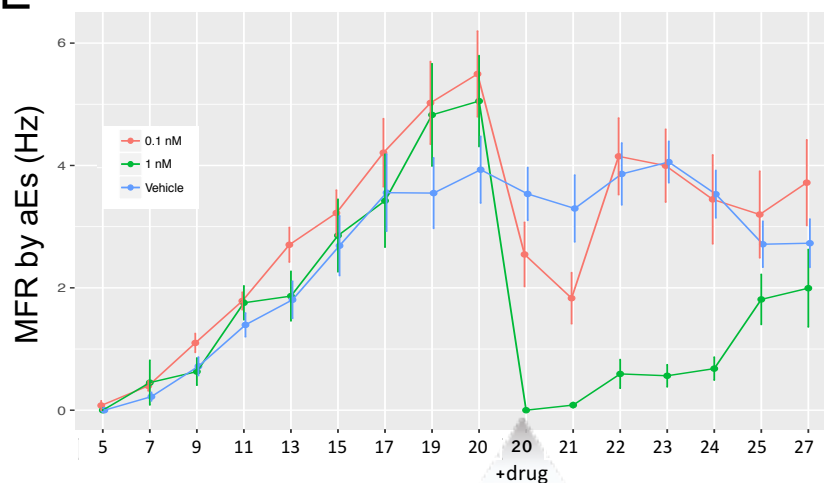

|   | Treatment/Genotype | perm.pval | MW pval  |
|---|--------------------|-----------|----------|
| 1 | Vehicle vs. 0.1 nM | 0.4       | 0.196    |
| 2 | Vehicle vs. 1 nM   | 0.01      | 7.46e-06 |

Figure 4

**A**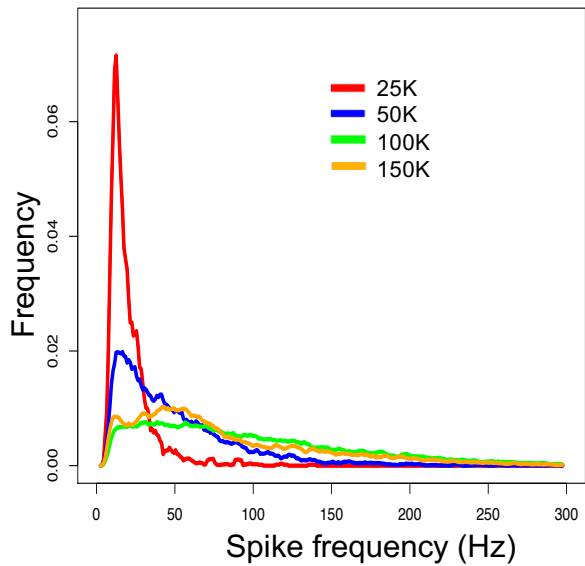**B**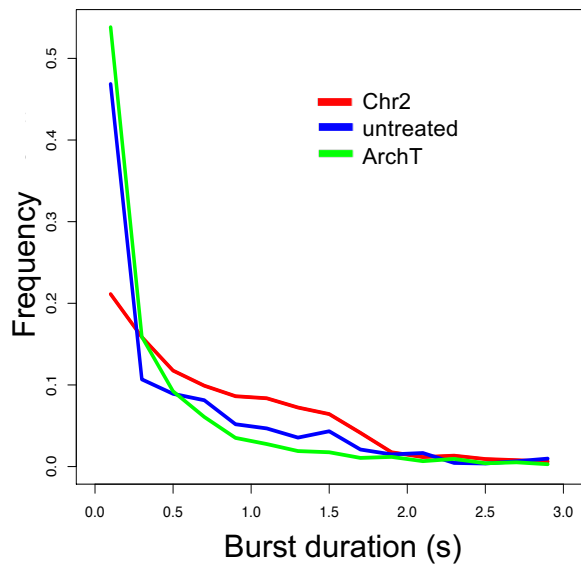**C**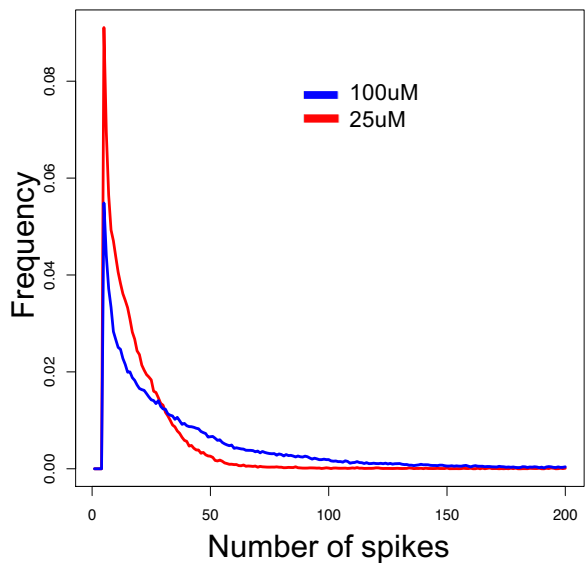**D**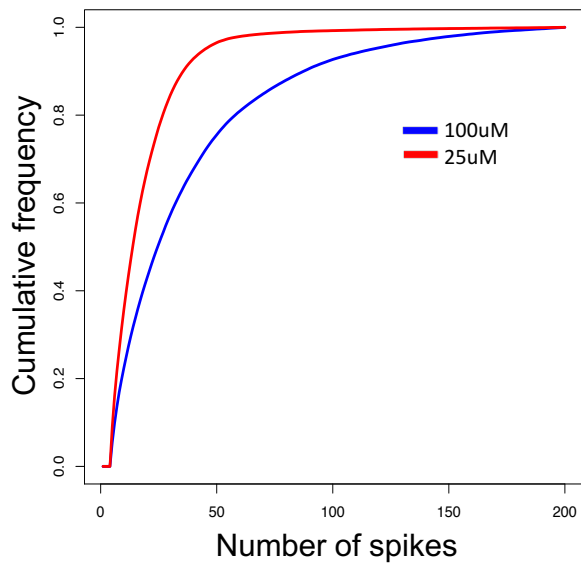**Figure 5**

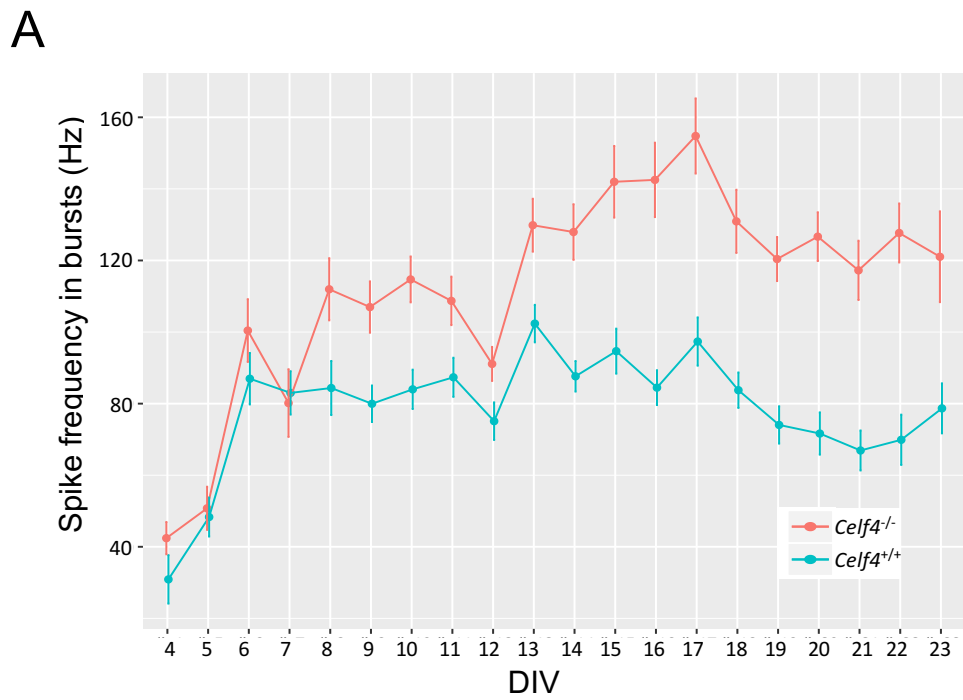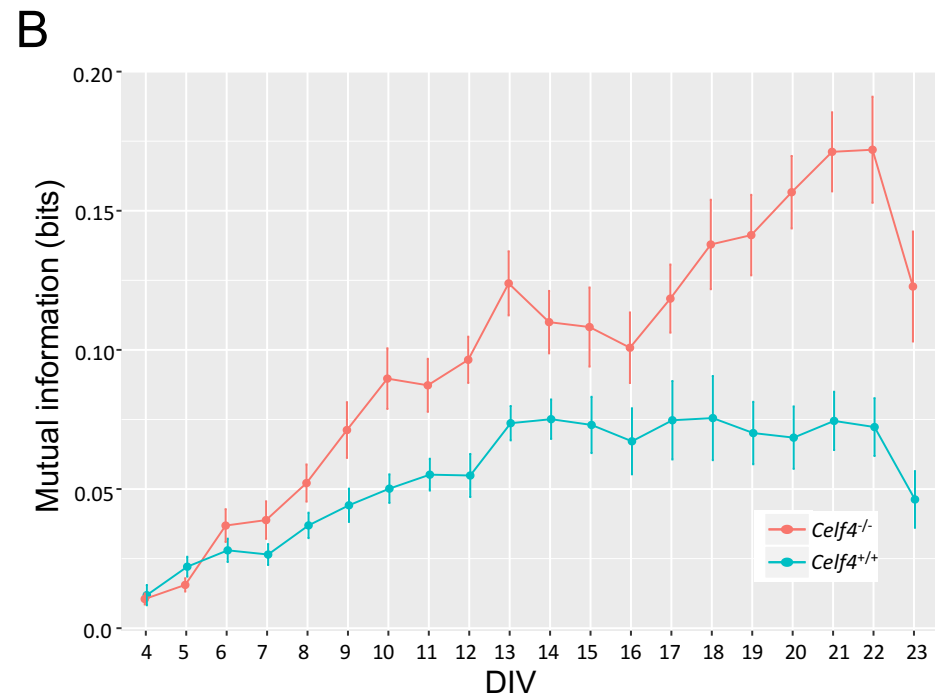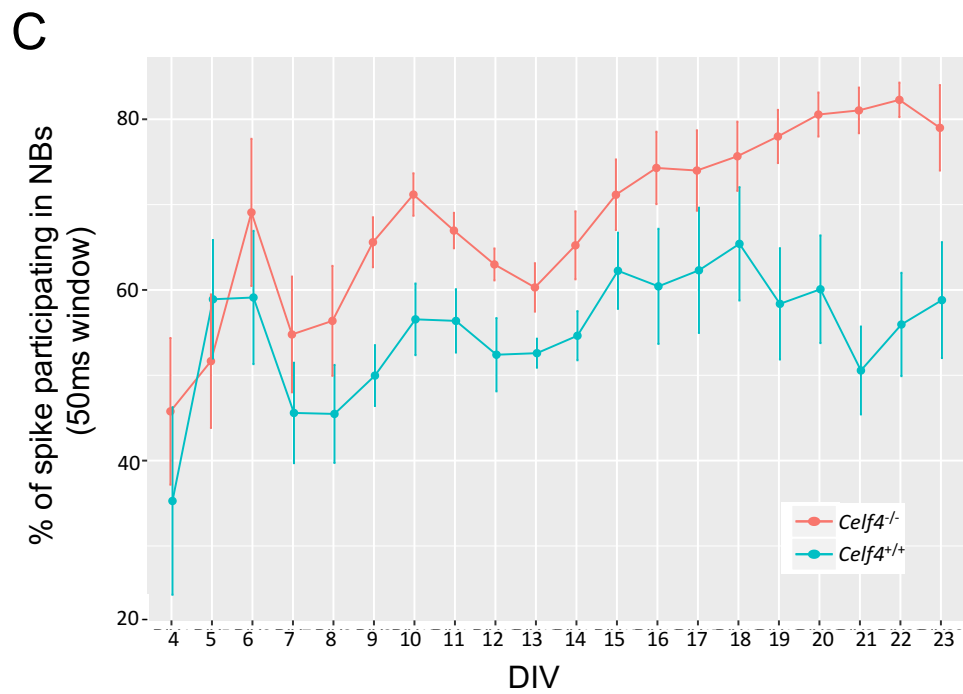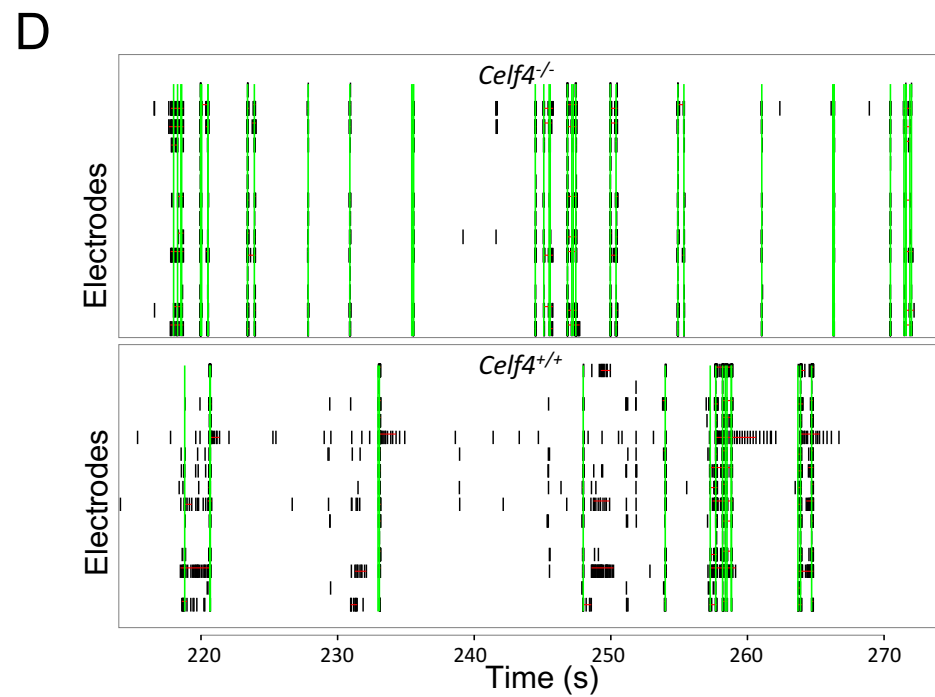

Figure 6
